1 **Vitexin alters *Staphylococcus aureus* surface hydrophobicity to interfere with biofilm**  
2 **formation.**

3  
4 Manash C. Das<sup>a</sup>, Antu Das<sup>a</sup>, Sourabh Samaddar<sup>b</sup>, Akshay Vishnu Daware<sup>a</sup>, Chinmoy  
5 Ghosh<sup>a,c</sup>, Shukdeb Acharjee<sup>a</sup>, Padmani Sandhu<sup>d</sup>, Junaid Jibran Jawed<sup>e</sup>, Utpal C. De<sup>f</sup>, Subrata  
6 Majumdar<sup>e</sup>, Sujoy K. Das Gupta<sup>b</sup>, Yusuf Akhter<sup>g</sup>, Surajit Bhattacharjee<sup>a</sup>

7  
8 <sup>a</sup>Department of Molecular Biology & Bioinformatics, Tripura University, Suryamaninagar,  
9 Tripura, 799022, India.

10 <sup>b</sup>Department of Microbiology, Centenary Campus, Bose Institute, CIT Road, Kolkata  
11 700054, India.

12 <sup>c</sup>Molecular Stress and Stem Cell Biology Group, School of Biotechnology, KIIT University,  
13 Bhubaneswar, Odissa 751024, India.

14 <sup>d</sup>Centre for Computational Biology and Bioinformatics, School of Life Sciences, Central  
15 University of Himachal Pradesh, Shahpur, District-Kangra, Himachal Pradesh 176206, India.

16 <sup>e</sup>Department of Molecular Medicine, Centenary Campus, Bose Institute, CIT Road, Kolkata  
17 700054, India.

18 <sup>f</sup>Department of Chemistry, Tripura University, Suryamaninagar, Tripura, 799022, India.

19 <sup>g</sup>Department of Biotechnology, Babasaheb Bhimrao Ambedkar University, Vidya Vihar,  
20 Raebareli Road, Lucknow, Uttar Pradesh, India.

21 Address correspondence to Surajit Bhattacharjee, sbhattacharjee@gmail.com

22

23 **Abstract** Bacterial surface hydrophobicity is one of the determinant biophysical parameters  
24 of bacterial aggregation for being networked to form biofilm. Phytoconstituents like vitexin  
25 have long been in use for their antibacterial effect. The present work is aimed to characterise  
26 the effect of vitexin on *S. aureus* surface hydrophobicity and corresponding aggregation to  
27 form biofilm. We have found that vitexin shows minimum inhibitory concentration at 252  
28 µg/ml against *S. aureus*. Vitexin reduces cell surface hydrophobicity and membrane  
29 permeability at sub-MIC dose of 126 µg/ml. The *in silico* binding analysis showed higher  
30 binding affinity of vitexin with surface proteins of *S. aureus*. Down regulation of *dltA*, *icaAB*  
31 and reduction in membrane potential under sub-MIC dose of vitexin, explains reduced *S.*  
32 *aureus* surface hydrophobicity. Vitexin has substantially reduced the intracellular adhesion of  
33 planktonic cells to form biofilm through interference of EPS formation, motility and

34 subsequent execution of virulence. This was supported by the observation that vitexin down  
35 regulates the expression of *icaAB* and *agrAC* genes of *S. aureus*. In addition, vitexin also  
36 found to potentiate antibiofilm activity of sub-MIC dose of gentamicin and azithromycin.  
37 Furthermore, CFU count, histological examination of mouse tissue and immunomodulatory  
38 study justifies the *in vivo* protective effect of vitexin from *S. aureus* biofilm associated  
39 infection. Finally it can be inferred that, vitexin has the ability to modulate *S. aureus* cell  
40 surface hydrophobicity which can further interfere biofilm formation of the bacteria.

#### 41 **Importance**

42 There has been substantial information known about role of bacterial surface hydrophobicity  
43 during attachment of single planktonic bacterial cells to any surface and the subsequent  
44 development of mature biofilm. This study presents the effect of flavone phytoconstituent  
45 vitexin on modulation of cell surface hydrophobicity in reducing formation of biofilm. Our  
46 findings also highlight the ability of vitexin in reducing *in vivo* *S. aureus* biofilm which will  
47 eventually outcompete the corresponding *in vitro* antibiofilm effect. Synergistic effect of  
48 vitexin on azithromycin and gentamicin point to a regime where development of drug  
49 tolerance may be addressed. Our findings explore one probable way of overcoming drug  
50 tolerance through application of vitexin in addressing the issue of *S. aureus* biofilm through  
51 modulation of cell surface hydrophobicity.

52  
53 **Keywords** Cell surface hydrophobicity, Intercellular adhesion, EPS, Vitexin, Biofilm, *In vivo*  
54 biofilm model.

55

56 **E**lectrical property of bacterial cell surface plays a key role in bacterial resistance to host  
57 effectors. Thus charge modification of cell wall and membrane components becomes  
58 very significant (1). In *S. aureus* this charge modification occurs by D-alanyl esterification of  
59 teichoic acid in the cell wall, which results in an increased positive charge on the cell (2). The  
60 addition of D-alanine esters to teichoic acids is typically mediated by the products of the *dlt*  
61 operon, which encodes four proteins: DltA, a D-alanine: D-alanyl carrier protein ligase; DltB,  
62 a D-alanyl transfer protein; DltC, the D-alanyl carrier protein; and DltD, a D-alanine esterase.  
63 Incorporation of D-alanine also contributes to the virulence of *Staphylococcus aureus*.  
64 Increased expression of *dlt* makes cell surfaces more positively charged which incorporate  
65 charge bilayer formation between inside and outside of cell surface. As a result cell exerts  
66 more hydrophobicity which in turn favours adhesion of cells by polysaccharide intercellular  
67 adhesin (PIA) (3). *In vitro* PIA can be synthesized from UDP-*N*-acetylglucosamine as

68 byproducts of the intercellular adhesion (*ica*) locus. In *S. aureus*, *icaABCD* was shown to  
69 mediate cell-cell adhesion and PIA production. It was further demonstrated that *icaA* and  
70 *icaD* together mediate the synthesis of sugar oligomers *in vitro*, using UDP-*N*-  
71 acetylglucosamine as a substrate (4).

72 Biofilm comprise of surface-attached microbial communities encased within a self-produced  
73 extracellular matrix and are associated with ~80% of bacterial infections in humans (5).  
74 Biofilm formation is thought to require two sequential steps: adhesion of cells to a solid  
75 substrate followed by cell-cell adhesion, creating multiple layers of cells (1,5). Intercellular  
76 adhesion requires the PIA (4). Biofilm formation from planktonic microorganisms often  
77 enhances the pathogenic capability of organisms. Bacterial biofilm associated infections are  
78 extremely challenging to treat, as biofilm may become refractory to inhibit by the majority of  
79 antibacterial drug used in clinical trial. In addition, biofilm also represent a sanctuary site in  
80 which bacteria are physically shielded from attack by the host immune system. Bacterial  
81 adherence to the surface of animal cells is an important step in the infection process (6) and  
82 hydrophobic interactions are thought to be involved in the adherence of bacteria to host  
83 tissues (7,8 and 9). Adherence of bacteria to other bacterial surfaces is affected by the change  
84 in interfacial free energy which corresponds to the process of attachment. Therefore, targeting  
85 the adherence property of planktonic form of bacteria may develop an effective strategy to  
86 prevent the formation of community structure i.e. biofilm. We have previously shown that  
87 vitexin, a polyphenolic flavone compound, possess significant antibacterial and antibiofilm  
88 property (9) against *Pseudomonas aeruginosa* biofilm. In the present study, we have assayed  
89 the involvement of bacterial cell surface hydrophobicity in biofilm formation by *S. aureus*. In  
90 that direction, we have explored the probable role of natural flavone like vitexin in reducing  
91 *S. aureus* surface hydrophobicity in order to reduce formation of biofilm.

92

## 93 **Results**

94 **Antimicrobial activity of vitexin, azithromycin and gentamicin.** The antimicrobial activity  
95 of vitexin, azithromycin and gentamicin were studied against *S. aureus*. We have observed  
96 that vitexin exhibited highest antimicrobial activity at MIC of 252 µg/ml concentration  
97 against the *S. aureus*. The MIC of azithromycin and gentamicin was found to be 110 µg/ml  
98 and 5 µg/ml respectively. From the data so obtained, we have selected 126 µg/ml, 106 µg/ml,  
99 86 µg/ml, 66 µg/ml, 46 µg/ml, 26 µg/ml sub-MIC doses of vitexin, 55 µg/ml sub-MIC dose  
100 of azithromycin and 2.5 µg/ml sub-MIC dose of gentamicin for all subsequent antibiofilm  
101 studies.

102 Most of the antimicrobials are specific for their mode of action and in this context we tested  
103 the killing potential of vitexin alone or in combination using a live-dead staining procedure  
104 (see Materials and Methods). To ensure that cells do not die due to the treatments we were  
105 intuitive about the extent of PI staining profile to compare the treated cells with the untreated  
106 ones. For the experiment *S. aureus* cells were grown to stationary phase (O.D~2.5) and  
107 subjected to the proposed treatments with vancomycin as the positive control (**Fig. 1A**) and  
108 untreated as negative control (**Fig. 1B**). MIC (8 µg/ml) dose of vancomycin was used as  
109 described previously (10). All samples with proper controls were analyzed through FACS  
110 after 48 hrs of treatment. To our expectation, the sub-MIC dose of vitexin (26 µg/ml) (MVTI)  
111 alone (3.6%) (**Fig. 1C**) or in combination with azithromycin (AZM) (5%) (**Fig. 1F**) or  
112 gentamycin (MGT) (2.7%) (**Fig 1G**) does not increase PI staining significantly as compared  
113 to the control (10.4%) (**Fig 1A**). Thus, staining profile from FACS data analysis shows that  
114 the viability of *S. aureus* cells remains unaltered with the proposed treatment profiles. For  
115 better comparison, percentages of PI stained dead cell (Q4) in positive control, negative  
116 control and treated samples were presented as bar diagram (**Fig. 1H**).

117

118 **Vitexin alters the cell surface hydrophobicity and membrane potential of *S. aureus*.** In  
119 the present work we have studied the surface hydrophobicity of *S. aureus* after treatment with  
120 vitexin alone and in combination. Initially cells were partitioned and cell attachment with  
121 acidic solvent and basic solvent was determined. It was found that cell attachments were  
122 reduced in basic solvent and increased in acidic solvent. Further, we have observed that  
123 hydrophobicity was significantly reduced after administration of vitexin in combination with  
124 gentamicin compared to their individual applications [**Fig. 2A**]. Statistical analysis was  
125 performed to determine relation between hydrophobicity (%) and cell attachment (%). The  
126 correlation coefficient values for basic solvent was found to be  $r = 0.9784$  and in case of case  
127 acidic solvent was  $r = -0.91496$  [**Fig. 2A**]. We have found that basic solvent slope was  
128 negative (-10.284) whereas acidic solvent slope was reverse (8.1297) than that of  
129 hydrophobicity (-10.269). This signifies that upon treatment (vitexin alone and in  
130 combination) cell surfaces gradually becomes less basic. As a result surface hydrophobicity  
131 was reduced which interfere with biofilm formation. All these together signify that cell  
132 surface hydrophobicity was the key regulator of cellular adhesion and biofilm formation.  
133 Further to know the effect of these compounds on bacterial cell membrane, we have studied  
134 membrane polarisation of all treated samples with respect to untreated control. We have  
135 observed that individual treatment with vitexin (26 µg/ml), gentamicin (2.5 µg/ml) and

136 azithromycin (55  $\mu\text{g/ml}$ ) membrane surface potential was declined [Fig. 2B]. The  
137 combination treatment of vitexin (26  $\mu\text{g/ml}$ ) with gentamicin (2.5  $\mu\text{g/ml}$ ) significantly  
138 increases *S. aureus* membrane potential as compared with treatment of individual compounds  
139 [Fig. 2B]. This signifies that vitexin can significantly increase the membrane surface charge  
140 and likewise reduce cell-cell adhesion to develop biofilm. The effect of vitexin was found to  
141 be potentiated in combination with gentamicin.

#### 142 **Effect of vitexin (alone and in combination) on biofilm regulatory proteins of *S. aureus*.**

143 To further understand the effect of compounds on biofilm regulatory genes, we have  
144 determined the relative mRNA expression of *dltA*, *icaAB* and *agrAC* genes using respective  
145 primers [Table S1]. Results showed that relative gene expressions of these proteins were  
146 significantly reduced where highest fold change was observed in case of vitexin-gentamicin  
147 combination treatment [Fig. 2C]. Fold changes of gene expressions with respect to vitexin  
148 treatment were calculated by taking 16S rRNA as an endogenous control. Furthermore *in*  
149 *silico* molecular binding affinity study was performed to analyse the effect of vitexin on  
150 biofilm associated protein of *S. aureus*. In that direction, we have carried out molecular  
151 docking study and attempted to compute the relative binding affinities of vitexin to these  
152 proteins. We have carried out possible docking for the proteins encoded by *Ica*, *Dlt*, *Agr* and  
153 *Tar* operon. From the molecular docking data, we have observed that vitexin bind into  
154 binding pocket of these proteins. For *ica* operon and *dlt* operon only two proteins i.e. IcaA  
155 [Fig. 2D (i, ii)] and DltA [Fig. 2D (iii, iv)] were showing affinity for vitexin, out of which  
156 IcaA was accommodating vitexin in its native binding pocket while in the case of DltA  
157 vitexin was occupied in a different position than that of its native ligand [Fig. 2D]. In the case  
158 of SasG [Fig. 2D (v, vi)] protein the vitexin showed a good affinity and bound to the native  
159 ligand binding pocket of these proteins. Further, we have energy minimized all vitexin-  
160 protein complexes to confirm the stability of complexes and it was also observed that all  
161 complexes were having a significantly lower potential energies [Table 1].

162 **Antibiofilm effect of vitexin on *S. aureus*.** Earlier results explain that vitexin reduces *S.*  
163 *aureus* surface hydrophobicity which have significant role on bacterial cell attachment. In  
164 that direction, we have tested effect of vitexin (alone and in combination) on biofilm  
165 formation by *S. aureus*. Results of crystal violet staining showed that vitexin at sub-MIC  
166 doses exerted significant biofilm attenuation against the microorganism and maximum  
167 activity was measured at 126  $\mu\text{g/ml}$  dose [Fig. 3A (i)]. It was also observed that antibiofilm  
168 activity of vitexin (26  $\mu\text{g/ml}$ ) was synergistically potentiated in combination with  
169 azithromycin (55  $\mu\text{g/ml}$ ) and gentamicin (2.5  $\mu\text{g/ml}$ ). The most potent antibiofilm efficacy

170 was observed in combination with gentamicin. Size of bacterial population in biofilm was  
171 determined through total extractable protein from the adhered microbial population. Data  
172 showed that vitexin treated samples have less extractable protein contents in comparison to  
173 the untreated control [**Fig. 3A (ii)**]. Maximum (69.43%) biofilm attenuation was observed at  
174 126 µg/ml dose of vitexin whereas, azithromycin (55 µg/ml) and gentamicin (2.5 µg/ml) have  
175 executed synergistic effect on 26 µg/ml of vitexin in attenuating biofilm total. Consistent  
176 with the CV staining assay, protein extraction assay also showed a similar pattern of biofilm  
177 attenuation [**Fig. 3A (i) and 3A (ii)**].

178 Furthermore, attenuation in biofilm formation by sub-MIC doses of vitexin alone and in  
179 combination were further validated by observation under AFM and SEM. AFM snapshots  
180 usually showed only surface topology of the cover slip surface from which cell-cell adhesion  
181 may not be explained properly. Thus to understand cellular adhesion under high  
182 magnification, cover slips from experimental sets were observed under SEM. AFM [**Fig. 3B**]  
183 and SEM [**Fig. 3C**] results shows that vitexin at sub-MIC doses significantly reduces cellular  
184 attachment leading to formation of biofilm. In the control set, untreated cells exert very  
185 prominent biofilm over the glass surface. We have also observed that vitexin (26 µg/ml)  
186 significantly potentiates the attenuation of cellular adhesion by gentamicin (2.5 µg/ml).  
187 Azithromycin (55 µg/ml) also shows moderate biofilm attenuation and cellular adhesion.  
188 Taken together, all these results indicate that vitexin at its sub-MIC (126 µg/ml) exhibited  
189 moderate biofilm attenuation activity whereas 26 µg/ml concentration of vitexin significantly  
190 potentiate the activity of gentamicin to inhibit biofilm formation.

191 **Vitexin significantly reduces the *S. aureus* EPS.** Biofilm is the cluster of planktonic cells  
192 attached by EPS. In the present work, we have quantified the amount of EPS with or without  
193 vitexin treatment. We have observed a significant correlation ( $r = 0.951$ ) between the  
194 measured quantity of EPS with antibiofilm activity of vitexin. Vitexin (126 µg/ml) treated  
195 samples showed significantly less quantifiable EPS whereas maximum EPS quantities were  
196 recorded (9.8% inhibition) in 26 µg/ml dose of vitexin [**Fig. 3D**]. But after combining sub-  
197 MIC doses of azithromycin and gentamicin separately with 26 µg/ml dose of vitexin, EPS  
198 quantities were reduced significantly (69.9% and 78.2% inhibition respectively) [**Fig. 3D**]. In  
199 addition to that, EPS DNA (eDNA) were also extracted from all samples (treated and  
200 untreated control). Agarose gel electrophoresis showed that eDNA quantity was significantly  
201 reduced after treatment with vitexin at 126 µg/ml dose. eDNA quantity was also significantly  
202 reduced after vitexin (26 µg/ml)-gentamicin (2.5 µg/ml) combination treatment than their  
203 respective individual application [**Fig. 3E**]. Ratio between biofilm total protein and EPS

204 reveals that with treatment reduction rate of protein was higher than that of EPS but  
205 maintains a steady state (slope = 0.0026). But suddenly in vitexin-gentamicin combined  
206 treatment, biofilm total protein and EPS ratio becomes significantly high [Fig. 3F]. This  
207 signifies that vitexin (26 µg/ml)-gentamicin (2.5 µg/ml) combination treatment have  
208 significantly reduced quantity of EPS. All these results validated that vitexin has potent  
209 antibiofilm activity at higher sub-MIC doses whereas reduced antibiofilm activity of  
210 gentamicin at very low doses was potentiated in combination with sub-MIC dose of vitexin  
211 (26 µg/ml). *In silico* binding affinity study of SpA protein with vitexin shows higher binding  
212 affinity which validates earlier result of reduction of *S. aureus* EPS after treatment with  
213 vitexin [Fig. 3G].

214 **Vitexin attenuated *S. aureus* sliding movement and release of bacterial protease.** Sliding  
215 motility is a kind of bacterial movement which is key regulator of biofilm formation by any  
216 bacteria. In the present work, we have observed that vitexin (126 µg/ml) treated cells showed  
217 marked reduction in sliding movement compared to the negative control [Fig. 4A (ii)]. It was  
218 also observed that sliding motility at vitexin (26 µg/ml)-gentamicin (2.5 µg/ml) treatment  
219 [Fig. 4A (vii)] was significantly less than that of their individual treatment. Furthermore,  
220 results have also demonstrated that vitexin (126 µg/ml) has executed significant inhibition in  
221 protease production by *S. aureus* [Fig. 4B]. It was also observed that lowest dose of vitexin  
222 (26 µg/ml) significantly increase the extent of attenuation of proteases by azithromycin and  
223 gentamicin. Among these, combination with gentamicin executed higher attenuation than  
224 combination with azithromycin.

225 To validate results of bacterial motility and virulence, *in silico* molecular docking were  
226 performed. We have observed that in *agr* operon AgrC (PDB ID: 4BXI) [Fig. 4C] and AgrA  
227 (PDB ID: 4G4K) [Fig. 4D] both were having high binding affinity for vitexin and were  
228 occupying the similar binding pocket as that of their native ligand. For biofilm formation  
229 associated proteins, TarF and TarO [Fig. 4G] the vitexin binds into the native ligand binding  
230 pocket of these proteins, while for TarL [Fig. 4E] and TarK [Fig. 4F] it binds to a different  
231 position than the original binding position of the ligand.

232 ***In vivo* efficacy of vitexin against catheter-associated infection in a murine model.**  
233 Furthermore, *in vivo* effects of vitexin (alone and in combination) on attenuation of biofilm  
234 was confirmed in mouse model. For that purpose catheter associated biofilm model was  
235 developed. At first, effect of these doses on mouse liver and spleen was analysed through  
236 histology and subsequently dispersion of catheter associated biofilm was also evaluated  
237 through CFU count. The paraffin embedded section of mouse liver and spleen from biofilm

238 infection control groups were compared with treated mouse liver and spleen. It was observed  
239 that portal vein and hepatic artery were very much dilated, distribution of hepatocytes were  
240 not uniform in liver of infection control mouse. The morphology of the hepatocytes, central  
241 vein and hepatic triad varies distinctly among different treatment groups. In mouse treated  
242 with vitexin 126 µg/ml, central vein was found regular and the shape of the hepatic lobules  
243 was also found to be restored [Fig. 5 (1-6)]. An additive effect of vitexin (26 µg/ml) and  
244 gentamycin (2.5 µg/ml) were also observed and it showed highest healing activity where the  
245 central vein, hepatic lobule, liver sinusoid, portal triads are found intact and healthy. The  
246 regions of splenic nodules, central artery, trabecular vessels, red pulp, and white pulp were  
247 identified in control and all the treatment groups [Fig. 5 (7-12)]. Results showed severe  
248 structural deformity in the tissue architecture in infection control mouse where it was found  
249 to be normalising in vitexin (26 µg/ml)-gentamycin (2.5 µg/ml) treated mouse. In addition to  
250 above results, we have determined tissue solidity and roundness through analysis of  
251 histological images which depicts that solidity was reduced and roundness was increased with  
252 treatment in comparison with untreated control [Fig. 6A]. This implies that tissue architecture  
253 was gradually restored after treatment with vitexin alone and in combination.  
254 Furthermore, a mouse model of catheter infection was used to evaluate the *in vivo* antibiofilm  
255 activity of vitexin alone and in combination with antibiotics. Bacteria were cultivated *in vitro*  
256 on implantable catheters and induced to form biofilm in mice. The effects of vitexin (alone  
257 and in combination) on catheter associated *in vivo* biofilm are shown in Fig. 6B. Vitexin  
258 (1300 µg/Kg-body weight) treatment plate shows 255 cfu/liver in comparison with untreated  
259 control where cell count were 436 cfu/liver. This validates the antibiofilm activity of vitexin  
260 against catheter associated *in vivo* biofilm form of *S. aureus* infection. This was also observed  
261 that combination of vitexin (1300 µg/Kg-body weight) with gentamicin (125 µg/Kg-body  
262 weight) treatment shows highest activity (26 cfu/liver) whereas with only gentamicin (125  
263 µg/Kg-body weight) colony count was 205 cfu/liver [Fig. 6B]. Bacterial load after treatment  
264 with vitexin (1300 µg/Kg-body weight) and azithromycin (2750 µg/Kg-body weight)  
265 treatment was found to be 59 cfu/liver [Fig. 6B]. All these observation firmly validates the *in*  
266 *vivo* antibiofilm activity of vitexin against *S. aureus* biofilm. Results also confirm that sub-  
267 MIC dose of vitexin potentiates the activity of sub-MIC dose of gentamicin against *in vivo* *S.*  
268 *aureus* biofilm.

269 **Effect of vitexin on inflammatory response in RAW 264.7 macrophages infected with *S.***  
270 ***aureus* biofilm.** *In vivo* antibiofilm effect of vitexin was further validated through study of



271 expression profile of inflammatory cytokines. The immune-modulatory effect of vitexin was  
272 studied on RAW 264.7 macrophage cells infected with *S. aureus* biofilm. Pro-inflammatory  
273 and anti-inflammatory cytokine level were quantified from the culture supernatant of  
274 bacteria-macrophage co-culture. In case of *S. aureus* infection it was observed that at 4 hr of  
275 infection, IL-10 level was 1.33 fold increased whereas IL-12 level was 1.27.fold decreased at  
276 protein level in untreated macrophages [**Fig. 6C**]. Vitexin treatment was found to reduce IL-  
277 10 production and increases the IL-12 level in infected macrophages both at protein [**Fig. 6D**]  
278 and mRNA level [**Fig. 6E**]. At 4 hr of treatment, IL-10 levels were 3.25 fold and 2.353 fold  
279 reduced at protein and mRNA level respectively with respect to infected macrophages.  
280 Treatment with gentamicin and azithromycin has found to reduce the IL-10 mRNA  
281 expression by 2.595 fold and 4.498 fold respectively [**Fig. 6D**]. Whereas at 4 hr of vitexin  
282 treatment, IL-12 levels were 1.6 fold and 9.33 fold increased at protein [**Fig. 6D**] and mRNA  
283 level [**Fig. 6E**] respectively with respect to infected macrophages. In case of azithromycin  
284 and gentamicin, IL-12 gene expression profiles were 10.67 fold and 9.03 fold elevated [**Fig.**  
285 **6E**]. All mRNA fold changes were calculated with respect to untreated infected macrophages  
286 and  $\Delta\Delta CT$  values were calculated taking GAPDH as endogenous control. Thus cytokine  
287 expression study at protein and mRNA level explores that vitexin effectively participate in  
288 the immune-modulation through induction of pro-inflammatory and suppression of anti-  
289 inflammatory cytokines in macrophages during infection with *S. aureus* biofilm.

290

## 291 **Discussion**

292 Bacterial surface charge and surface property are key regulators toward formation of biofilm.  
293 In this context in the present work we have evaluated *S. aureus* surface hydrophobicity after  
294 treatment with vitexin. Further we have evaluated *in vitro* and *in vivo* antibiofilm effect of  
295 vitexin on biofilm formation by *S. aureus*. Keeping view of increasing drug tolerance, in the  
296 present work we have also determined the effect of sub-MIC dose of vitexin on sub-MIC  
297 dose of azithromycin and gentamicin.

298 Microbial biofilm represents a dense association of microorganisms firmly attached to a  
299 substratum which creates difficulty in estimating the total number of bacteria in a given  
300 biofilm structure (9,11,12). In bacterial population inter-bacterial communication by Quorum  
301 Sensing (QS) produces EPS, which forms a network with all the adjacent bacterial colonies to  
302 form biofilm (8,13). Furthermore, cell surface hydrophobicity study and membrane  
303 depolarisation study explores that treatment with vitexin-gentamicin significantly reduced the

304 cell surface hydrophobicity. Reduction in cell surface hydrophobicity minimizes surface  
305 tension of cell surface. *dlt* operon mediates the addition of D-alanine esters to teichoic acids.  
306 *dlt* operon encodes four proteins out of which *dltA* is a D-alanine : D-alanyl carrier protein  
307 ligase which is required for successful addition of D-alanine to the cell wall (14).  
308 Incorporation of D-alanine into teichoic acid has been demonstrated to increase membrane  
309 free charge and resistance of bacteria to antibacterial as well as contribute to the virulence of  
310 pathogens. As a result of down regulation of *dltA* gene cell surface becomes less charged  
311 with reduced surface tension. Subsequently, cells treated with vitexin-gentamicin  
312 combination utilizes higher quantity of membrane polarisation dye DiSc3, subsequently  
313 release very less quantity and shows significantly less fluorescent intensity. In addition to the  
314 reduced cell surface hydrophobicity and surface charges, *icaAB* gene was also down  
315 regulated. During biofilm formation the adhesion of bacteria to a substrate surface by cell-cell  
316 adhesion forms multiple layers of the biofilm (15). This process is associated with the  
317 polysaccharide intercellular adhesin (PIA) as a function of *ica* locus (15). It was further  
318 demonstrated that *icaA* and *icaD* together mediate the synthesis of sugar oligomers *in vitro*,  
319 using UDP-*N*-acetylglucosamine as a substrate for EPS production. Down regulation of  
320 *icaAB* leads to reduced intercellular adhesion between cells for colonisation and biofilm  
321 formation. In support to this we have observed significantly reduced EPS and eDNA quantity  
322 which can reduce bacterial quorum sensing.

323 The Quorum Sensing (QS) phenomena is activated when bacterial aggregates reach to a  
324 threshold of certain population density and is reported to be extensively associated with  
325 biofilm formation (16). In order to understand the effect of vitexin and in combination, we  
326 have examined the effect of vitexin on QS mediated sliding movement and secretion of  
327 proteases by *S. aureus*. In this relation we have observed down regulation of *agrAC* which  
328 significantly reduce sliding movement and protease secretion. The accessory gene regulator  
329 (*agr*) locus of *Staphylococcus aureus* encodes a two-component signal transduction system  
330 that leads to the down-regulation of surface proteins and up-regulation of secreted proteins  
331 during *in vitro* growth (16). In essence, *agrB* activity leads to the secretion of the auto  
332 inducing pheromone, *agrD*, which binds to and activates the histidine kinase receptor, *agrC*,  
333 which subsequently activates the response regulator, *agrA*. The inhibitory activity of these  
334 *agr* groups represents a form of bacterial interference that affects virulence gene expression  
335 (17). Sliding leads to rapid bacterial translocation and adherence to the surface that promotes  
336 efficient colonization of bacterial cells. It was also reported in literature that sliding  
337 movement is initiated and functionalises through QS which facilitate bacterial movement

338 from one place to the other. This in turn stimulates bacteria to form biofilm network over the  
339 surface. Proteases are products of bacterial metabolism which are hydrolytic in nature that  
340 affect the proteins of the host cells (infected tissue), thereby facilitating bacterial invasion and  
341 growth (18).

342 Furthermore, *in vivo* effect of vitexin was also evaluated. Mouse liver and spleen is secondary  
343 lymphoid organ which help in metabolizing pathogens and food materials. After insertion of  
344 biofilm layered catheter, bacteria will migrate in different organ of the body through blood  
345 stream (9,19). As a result bacterial load will rise in liver as well as in spleen. Furthermore,  
346 co-culture of bacteria with macrophage also can be used as an efficient tool to study  
347 antimicrobial and immunomodulatory effect of any compounds. During infection, host  
348 defence counteract the inflammatory response through modulation of expression of pro and  
349 anti-inflammatory cytokines. In the present study, we have observed that vitexin provides  
350 protection to murine macrophage cell line from *S. aureus* biofilm infection through induction  
351 of pro-inflammatory cytokines (20,21).

## 352 **Methods**

353 **Flow cytometry and live/dead staining.** 1 ml of cells ( $10^6$  cells/ml) (untreated or treated)  
354 were stained with the FDA/PI (fluorescein diacetate/propidium iodide) combination stains  
355 and kept at 37°C for 2 hr and then washed with PBS and resuspended in the same buffer (22).  
356 Cells were analyzed using FACS Aria system (Becton Dickinson, NJ) and data acquisition  
357 was done using FACS Diva software.

358 **Bacterial cell surface hydrophobicity.** An aliquot of *S. aureus* culture was inoculated into  
359 basal media supplemented with glucose and ammonium sulphate and incubated at 37°C for 2  
360 days. Thereafter, cells were harvested from each experimental set and cell surface  
361 hydrophobicity was examined by bacterial adhesion to hydrocarbon (BATH) assay as  
362 described previously (23). The formula for measuring cell surface hydrophobicity is as  
363 follows:

$$364 \text{ Cell surface hydrophobicity (\%)} = 100X\{(\text{initial OD} - \text{final OD})/\text{initial OD}\}$$

365 **Physicochemical characterization of the cell surface.** Hydrophobicity and the Lewis  
366 acid/base character of *S. aureus* populations were investigated according to the microbial  
367 adhesion to solvents (MATS) method with minor modifications (24).

368 The percentage of cells associated with each solvent was determined as follows:

$$369 \text{ Cell attachment affinity (\%)} = (1 - A/A_0) \times 100.$$

370 **Membrane depolarization study.** The ability of vitexin to depolarize the transmembrane  
371 potential of target bacteria was tested by DiSC<sub>3</sub>5-based membrane depolarization assay (25).  
372 Cells treated with azithromycin (55 µg/ml) and gentamicin (2.5 µg/ml) was used as positive  
373 control samples.

374 **Gene expression study by real time PCR.** RNA from vitexin treated and untreated *S.*  
375 *aureus* was isolated by Trizol. RNA was reverse transcribed to cDNA, gene of interests were  
376 amplified using respective set of primers and relative gene expression were quantified by real  
377 time PCR using Real-Time PCR Detection System (StepOnePlus, Applied Biosystems) by  
378 2(2DDCt) method. The expression levels of all selected genes were normalized using 16S  
379 rRNA as an internal standard (26).

380 **Antibiofilm activity of vitexin.** Interference of biofilm formation upon treatment were  
381 performed as the method described in supplementary material for biofilm forming ability of  
382 the bacteria. Percentage of biofilm inhibition in all treated wells with respect to untreated  
383 controls was determined using the following formula:

384 Biofilm Inhibition (%) = {(OD of untreated control) – (OD of treated sample) / (OD of  
385 untreated control)} X 100.

386 **Observation of biofilm by atomic force microscopy (AFM) and Scanning Electron  
387 Microscopy (SEM).** *S. aureus* was cultured in 35 X 10 mm petridish on the surface of cover  
388 slips. After the incubation, cover slips were collected, washed gently with sterile PBS and  
389 observed under microscope. In case of atomic force microscopy (Bruker-Innova) films were  
390 analysed first at 10 µm scale and gradually up to 2 µm scale at a scanning speed of 1 Hz (27).  
391 All images were obtained with a resolution of 512 X 512 pixels.

392 In case of SEM, cover slips with biofilm were fixed with 2.5% (v/v) glutaraldehyde and the  
393 samples were dehydrated with increasing concentrations of tetramethylsilane (TMS) for 2  
394 min each. The samples were stored in vacuum until use. Prior to analysis by SEM [JSM-6360  
395 (JEOL)] samples were subjected to gold sputtering (JEOL JFC 1100E Ion sputtering device).  
396 Images were captured from 20 different fields from a single cover slip (28).

397 **Histopathology of mouse liver and spleen.** Livers from mice were fixed in 10% neutral  
398 buffered formalin solution, dehydrated in graded alcohol and embedded in paraffin. Paraffin  
399 sections of 3-4 micron thickness were obtained, mounted on glass slides and counterstained  
400 with hematoxylin and eosin for light microscopic analyses (29). Histochemical analysis of  
401 tissues of treated mice with respect to untreated control was done using Image J software.

402 **Immunomodulatory study of biofilm macrophage co-culture.**

403 The bactericidal effect of vitexin on macrophages after infection with *S. aureus* biofilm was  
404 performed as described previously by Auriche et al. 2010 with minor modifications.  
405 Following that cytokine protein expression were quantitated through ELISA and gene  
406 expressions were through qPCR (30).

407 **Statistical Analysis.** All experiments were performed in triplicate. Data were presented as  
408 mean  $\pm$  standard error. All analysis was performed with Graph Pad Prism (version 6.0)  
409 software. Significance level was determined by using One way ANOVA and mentioned as *P*  
410 value  $< 0.01$  (\*), *P* value  $< 0.001$  (\*\*) and *P* value  $< 0.0001$  (\*\*\*)).

411

412 **Competing interest declaration.** Authors have declared that they have no competing  
413 interest.

414 **Acknowledgements.** Authors are thankful to Department of Chemistry, Tripura University  
415 and Bose Institute for extending their instrumental facility. Authors would also like to thank  
416 Dr. Syed Arshad Hussain, Dept. of Physics, Tripura University for instrumental support.  
417 Authors also like to acknowledge Dr. Avik Sarkar, Dept. of Molecular Biology &  
418 Bioinformatics, Tripura University, India for their effort in finalising the manuscript.  
419 Research in Dr. S. Bhattacharjee's lab is supported by Govt. of India extramural research  
420 funds from ICMR and DBT. Research in Dr. Y. Akhter's lab is supported by Govt. of India  
421 extramural research funds from UGC and SERB-DST.

422

## 423 REFERENCES

- 424 1. Rahman MM, Hunter HN, Prova S. 2016. The *Staphylococcus aureus* methicillin  
425 resistance factor *fmta* is a d-amino esterase that acts on teichoic acids. *MBio* 7: e02070-15.  
426 <https://doi.org/10.1128/mBio.02070-15>.
- 427 2. Collins LV, Kristian SA, Weidenmaier C. 2002. *Staphylococcus aureus* strains lacking D-  
428 alanine modifications of teichoic acids are highly susceptible to human neutrophil killing and  
429 are virulence attenuated in mice. *J Infect Dis* 186: 214-219. <https://doi.org/10.1086/341454>.
- 430 3. Cramton SE, Gerke C, Schnell NF, Nichols WW, Götz F. 1999. The intercellular adhesion  
431 (*ica*) locus is present in *Staphylococcus aureus* and is required for biofilm formation. *Infect*  
432 *Immun* 67:5427-33. <https://www.ncbi.nlm.nih.gov/pmc/articles/PMC96900/>
- 433 4. Lin MH Shu JC Lin LP. 2015. Elucidating the crucial role of poly N-acetylglucosamine  
434 from *Staphylococcus aureus* in cellular adhesion and pathogenesis. *PLoS One* 10: e0124216.  
435 <https://doi.org/10.1371/journal.pone.0124216>

- 436 5. Bjerkan G, Witsø E, & Bergh K. 2009. Sonication is superior to scraping for retrieval of  
437 bacteria in biofilm on titanium and steel surfaces in vitro. *Acta Orthopaedica* 80:245–250.  
438 <http://doi.org/10.3109/17453670902947457>.
- 439 6. Misawa Y, Kelley KA, Wang X. 2015. *Staphylococcus aureus* colonization of the mouse  
440 gastrointestinal tract is modulated by wall teichoic acid, capsule, and surface proteins. *PLoS*  
441 *Pathog* 22: e1005061. <https://doi.org/10.1371/journal.ppat.1005061>
- 442 7. Lather P, Mohanty AK, Jha P. 2016. Contribution of cell surface hydrophobicity in the  
443 resistance of *Staphylococcus aureus* against antimicrobial agents. *Biochem Res Int* 2016:  
444 1091290. <https://doi.org/10.1155/2016/1091290>.
- 445 8. Harapanahalli AK, Chen Y, Li J. 2015. Influence of adhesion force on *icaa* and *cida* gene  
446 expression and production of matrix components in *Staphylococcus aureus* biofilms. *Appl*  
447 *Environ Microbiol* 15: 3369-3378. <https://doi.org/10.1128/AEM.04178-14>.
- 448 9. Das MC, Sandhu P, Gupta P. 2016. Attenuation of *Pseudomonas aeruginosa* biofilm  
449 formation by Vitexin: A combinatorial study with azithromycin and gentamicin. *Sci Rep* 6:  
450 23347. <https://doi.org/10.1038/srep23347>.
- 451 10. Wang G, Hindler JF, Ward KW, Bruckner DA. 2006. Increased vancomycin MICs for  
452 *Staphylococcus aureus* clinical isolates from a university hospital during a 5-year period. *J*  
453 *Clin Microbiol* 44: 3883-3886. <https://doi.org/10.1128/JCM.01388-06>.
- 454 11. Jabra-Rizk MA, Meiller TF, James CE. 2006. Effect of Farnesol on *Staphylococcus*  
455 *aureus* biofilm formation and antimicrobial susceptibility. *Antimicrob Agents Chemother* 50:  
456 1463–1469. <https://doi.org/10.1128/AAC.50.4.1463-1469>.
- 457 12. Hall-Stoodley L, Costerton JW, Stoodley P. 2004. Bacterial biofilms: From the natural  
458 environment to infectious diseases. *Nat Rev Microbiol* 2: 95–108.  
459 <https://doi.org/10.1038/nrmicro821>.
- 460 13. Peterson BW, van der Mei HC, Sjollem J. 2013. A distinguishable role of eDNA in the  
461 viscoelastic relaxation of biofilms. *MBio* 4: e00497-13. [https://doi.org/10.1128/mBio.00497-](https://doi.org/10.1128/mBio.00497-13)
- 462 14. McBride SM, Sonenshein AL. 2011. The *dlt* operon confers resistance to cationic  
463 antimicrobial peptides in *Clostridium difficile*. *Microbiology* 157: 1457-1465.  
464 <https://doi.org/10.1099/mic.0.045997-0>.
- 465 15. Khoramian B, Jabalameli F, Niasari-Naslaji A. 2015. Comparison of virulence factors  
466 and biofilm formation among *Staphylococcus aureus* strains isolated from human and bovine  
467 infections. *Microb Pathog* 88: 73-77. <https://doi.org/10.1016/j.micpath.2015.08.007>.
- 468 16. Wi YM, Park YK, Moon C. 2015. The cefazolin inoculum effect in methicillin-  
469 susceptible *Staphylococcus aureus* blood isolates: their association with dysfunctional

- 470 accessory gene regulator (*agr*). *Diagn Microbiol Infect Dis* 83: 286-291.  
471 <https://doi.org/10.1016/j.diagmicrobio.2015.07.011>.
- 472 17. Soon RL, Lenhard JR, Reilly I. 2017. Impact of *Staphylococcus aureus* accessory gene  
473 regulator (*agr*) system on linezolid efficacy by profiling pharmacodynamics and RNAIII  
474 expression. *J Antibiot* 70:98–101. <https://doi.org/10.1038/ja.2016.59>.
- 475 18. Sarkar R, Chaudhary SK, Sharma A. 2014. Anti-biofilm activity of Marula - a study with  
476 the standardized bark extract. *J Ethnopharmacol* 154: 170-175.  
477 <https://doi.org/10.1016/j.jep.2014.03.067>.
- 478 19. Beltrame CO, Côrtes MF, Bonelli RR. 2015. Inactivation of the autolysis-related genes  
479 *lrgB* and *yycI* in *Staphylococcus aureus* increases cell lysis-dependent eDNA release and  
480 enhances biofilm development *in vitro* and *in vivo*. *PLoS One* 10: e0138924.  
481 <https://doi.org/10.1371/journal.pone.0138924>.
- 482 20. Kuo CF, Luo YH, Lin HY. 2004. Histopathologic changes in kidney and liver correlate  
483 with streptococcal pyrogenic exotoxin B production in the mouse model of group A  
484 streptococcal infection. *Microb Pathog* 36:273-285.  
485 <https://doi.org/10.1016/j.micpath.2004.01.003>.
- 486 21. Papp S, Moderzynski K, Rauch J. 2016. Liver Necrosis and lethal systemic inflammation  
487 in a murine model of rickettsia typhi infection: role of neutrophils, macrophages and NK  
488 cells. *PLoS Negl Trop Dis* 10: e0004935. <https://doi.org/10.1371/journal.pntd.0004935>
- 489 22. Samaddar S, Grewal RK, Sinha S, Ghosh S, Roy S. 2015. Dynamics of  
490 Mycobacteriophage-Mycobacterial Host Interaction: Evidence for Secondary Mechanisms  
491 for Host Lethality. *Appl Environ Microbiol* 82:124-133. [https://doi.org/10.1128/AEM.02700-](https://doi.org/10.1128/AEM.02700-15)  
492 15
- 493 23. Tribedi P, Sil AK. 2013. Cell surface hydrophobicity: a key component in the degradation  
494 of polyethylene succinate by *Pseudomonas* sp. AKS2. *J Appl Microbiol* 116: 295-303.  
495 <https://doi.org/10.1111/jam.12375>.
- 496 24. Prokopovich P, Perni S. 2009. An investigation of microbial adhesion to natural and  
497 synthetic polysaccharide-based films and its relationship with the surface energy components.  
498 *J Mater Sci Mater Med* 20: 195-202. <https://doi.org/10.1007/s10856-008-3555-6>
- 499 25. Chitemerere TA, Mukanganyama S. 2014. Evaluation of cell membrane integrity as a  
500 potential antimicrobial target for plant products. *BMC Complement Altern Med* 14: 278.  
501 <https://doi.org/10.1186/1472-6882-14-278>

- 502 26. Sabharwal N, Dhall S, Chhibber S. 2014. Molecular detection of virulence genes as  
503 markers in *Pseudomonas aeruginosa* isolated from urinary tract infections. Int J Mol  
504 Epidemiol Genet 5: 125-134. <https://www.ncbi.nlm.nih.gov/pmc/articles/PMC4214259/>  
505 27. Harimawan A, Ting YP. 2016. Investigation of extracellular polymeric substances (EPS)  
506 properties of *P. aeruginosa* and *B. subtilis* and their role in bacterial adhesion. Colloids Surf  
507 B Biointerfaces 146: 459-467. <https://doi.org/10.1016/j.colsurfb.2016.06.039>.  
508 28. Kumar L, Chhibber S, Harjai K. 2013 Zingerone inhibit biofilm formation and improve  
509 antibiofilm efficacy of ciprofloxacin against *Pseudomonas aeruginosa* PAO1. Fitoterapia 90:  
510 73–78. <https://doi.org/10.1016/j.fitote.2013.06.017>.  
511 29. Teixeira FM, Fernandes BF, Rezende AB. 2008. *Staphylococcus aureus* infection after  
512 splenectomy and splenic autotransplantation in BALB/c mice. Clin Exp Immunol 154: 255-  
513 263. <https://doi.org/10.1111/j.1365-2249.2008.03728.x>.  
514 30. Auriche C, Di Domenico EG, Pierandrei S, Lucarelli M, Castellani S. 2010. CFTR  
515 expression and activity from the human CFTR locus in BAC vectors, with regulatory regions  
516 isolated by a single procedure. Gene Ther 11:1341–1354. <https://doi.org/10.1038/gt.2010.89>.  
517

#### 518 **Figure and Table Legends:**

519 **Figure 1:** Flow cytometric scatter plot showing live-dead staining profile. The scatter dot-  
520 plot is quadrant analyzed using representative colours. The green dots (Q1) represent FDA  
521 stained cells, the orange dots (Q2) represent cells stained with FDA and PI, the blue dots (Q3)  
522 represent the unstained cells and the red dots represent (Q4) PI stained cells. FDA  
523 fluorescence was measured using the FITC-channel and PI stain was measure using PI  
524 channel. Vancomycin treated cells were taken as the positive control [A] whereas untreated  
525 cells were used as negative control [B]. Vitexin [C], azithromycin [D] and gentamicin [E]  
526 treated cells were assayed either alone or in combination as vitexin + azithromycin (MVTI +  
527 AZM) [F] or vitexin + gentamicin (MVTI + MGT) [G]. Cell number in the Q3 quadrant  
528 indicates the percentage of cells that are PI positive which is a measure of *S. aureus* cell  
529 death. Percentage of dead cells from all experimental sets was presented [H].

530 **Figure 2:** [A] Graphical representation and statistical analysis of cell surface hydrophobicity  
531 (treated and untreated) in cell attachment (treated and untreated) with acidic and basic  
532 solvent. Relationship between these parameters were also analysed through slope of the curve  
533 and comparison of correlation coefficient. [B] Extent of *S. aureus* membrane depolarisation  
534 (treated and untreated) determined through fluorescence intensity of polarisation sensitive  
535 dye DiSC<sub>3</sub>. [C] Gene expression study of *icaAB*, *dltA* and *agrAC* gene of *S. aureus*. Changes



536 in gene expression of all treatments were calculated with respect to untreated control taking  
537 16S rRNA as endogenous control. Relative gene expression of A 55 µg/ml, G 2.5 µg/ml, V  
538 26+A 55 µg/ml and V 26+G 2.5 µg/ml were presented with respect to V 26 µg/ml treatment.  
539 [D] Cartoon representation of protein-ligand complexes with helices coloured in cyan, beta  
540 strand in red and coils in magenta colour. Ligand was coloured green and represented in  
541 sticks model. Ligplot of protein-ligand complexes are showing interaction of vitexin with  
542 protein residues DltA (i, ii), IcaA (iii, iv) and SasG (v, vi).

543 All data were expressed as mean ± SD (n=4 mice per group). \*P<0.01, \*\*P<0.001 and  
544 \*\*P<0.001 compared with infected mice and calculated through one way ANOVA. Pearson's  
545 Correlation method was used for determining correlation coefficient.

546 **FIG 3:** Effect of sub-MIC doses of vitexin and in combination with azithromycin and  
547 gentamicin against *S. aureus* on biofilm inhibition [A (i)] and inhibition in biofilm total  
548 protein [A (ii)]. [B] Observation of vitexin (alone and in combination) treated and untreated  
549 biofilm under atomic force microscope at 2 µm scale. [C] Observation of treated *S. aureus*  
550 biofilm and bacterial attachment with respect to untreated control through Scanning Electron  
551 Microscope. [D] Inhibition (percentage) in *S. aureus* EPS formation after treatment with  
552 vitexin and in combination with azithromycin and gentamicin with respect to untreated  
553 control. [E] Agarose gel electrophoresis of eDNA extracted from untreated and treated *S.*  
554 *aureus*. Band intensity of vitexin (2), azithromycin (3), gentamicin (4), vitexin-azithromycin  
555 (5) and vitexin-gentamicin (6) were compared with respect to untreated control (1). [F]  
556 Comparative analysis of modulation of EPS and biofilm protein as an indicator of biofilm  
557 inhibition through determination of ratio of biofilm total protein (%) and EPS (%). [G]  
558 Cartoon representation of protein-ligand complexes with helices coloured in cyan, beta strand  
559 in red and coils in magenta colour. Ligand was coloured green and represented in sticks  
560 model. Ligplot of protein-ligand complexes are showing interaction of vitexin with protein  
561 residues SpA (I, ii).

562 All data were expressed as mean ± SD (n=4 mice per group). \*P<0.01, \*\*P<0.001 and  
563 \*\*P<0.001 compared with infected mice and calculated through one way ANOVA.

564 **Figure 4:** Attenuation of sliding movement [A] and protease secretion [B] by *S. aureus* after  
565 treatment with vitexin (alone, in combination with azithromycin and gentamicin). Cartoon  
566 representation of protein-ligand complexes with helices coloured in cyan, beta strand in red  
567 and coils in magenta colour. Ligand was coloured green and represented in sticks model.  
568 Ligplot of protein-ligand complexes are showing interaction of vitexin with protein residues  
569 AgrC [C(i)(ii)], AgrA [D(i)(ii)], TarL [E(i)(ii)], TarK [F(i)(ii)] and TarO [G(i)(ii)].

570 All data were expressed as mean  $\pm$  SD (n=4 mice per group). \*P<0.01, \*\*P<0.001 and  
571 \*\*P<0.001 compared with infected mice and calculated through one way ANOVA.

572 **Figure 5:** Histopathological examination of mouse (*S. aureus* biofilm model) liver and spleen  
573 after all treatments with respect to untreated control [A]. In liver a= central vein, b=  
574 lymphocytes, c= sinusoids and d= hepatocytes; in spleen a= capsule, b= trabecula, c= central  
575 arteriole, d= red pulp and e= white pulp [A].

576 **Figure 6:** [A] *In silico* analysis of tissue (mouse liver and spleen) solidity and roundness of  
577 cell through Image-J software. [B] Estimation of bacterial load in mouse (biofilm model)  
578 liver and spleen determined through CFU count on agar plate. [C] Expression of IL-10 and Il-  
579 12 cytokines at protein level determined through ELISA. [D] IL-10 and [E] IL-12 gene  
580 expression in RAW macrophages after infection with *S. aureus* biofilm.

581 All data were expressed as mean  $\pm$  SD (n=4 mice per group). \*P<0.01, \*\*P<0.001 and  
582 \*\*P<0.001 compared with infected mice and calculated through one way ANOVA.

### 583 **Table legend**

584 **Table 1:** Binding affinity and potential energy values after energy minimization of biofilm  
585 associated proteins from *S. aureus* with a probable inhibitor molecule vitexin.

586

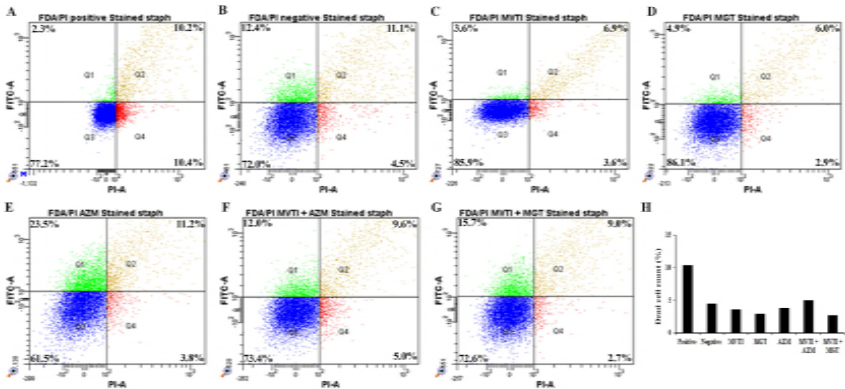

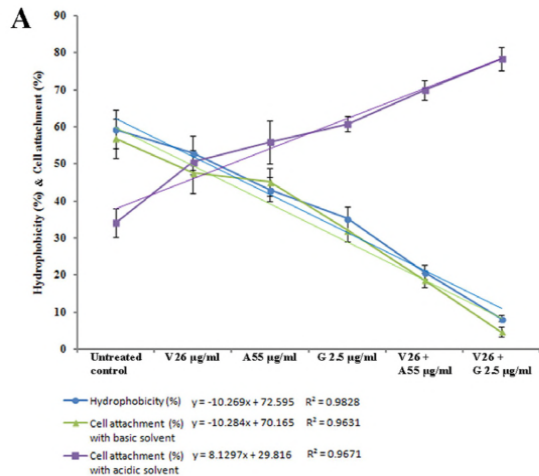

|                                                               | Comparison of slope | Co-relation coefficient ( $r$ ) |
|---------------------------------------------------------------|---------------------|---------------------------------|
| Hydrophobicity (%) Vs Cell attachment (%) with basic solvent  | -10.269 vs -10.284  | 0.9784                          |
| Hydrophobicity (%) Vs Cell attachment (%) with acidic solvent | -10.269 vs 8.1297   | -0.91496                        |

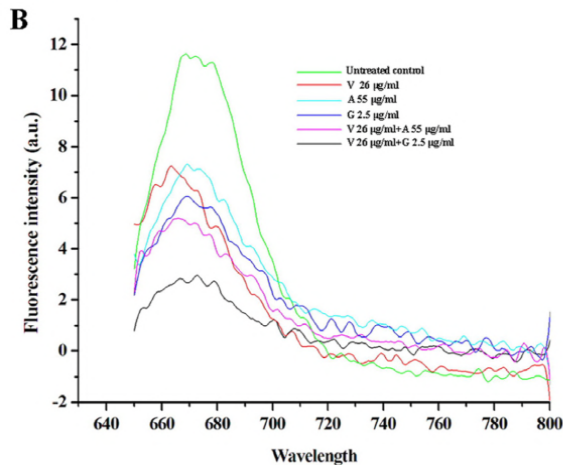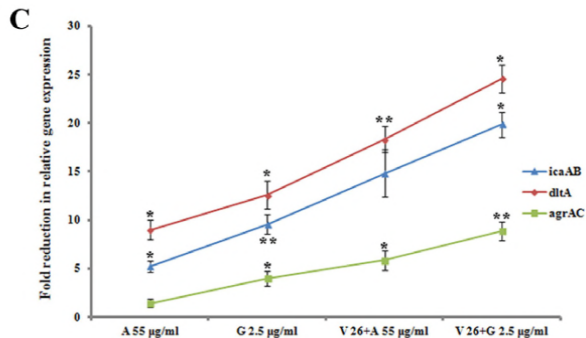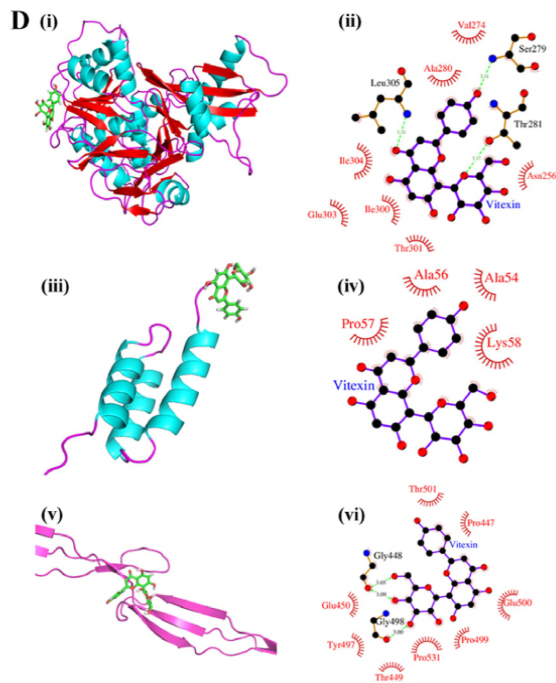

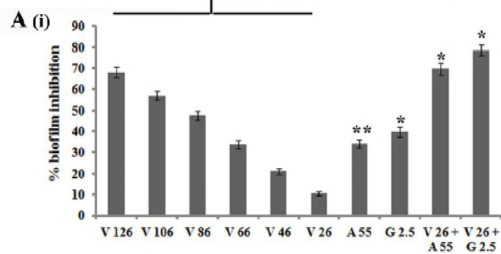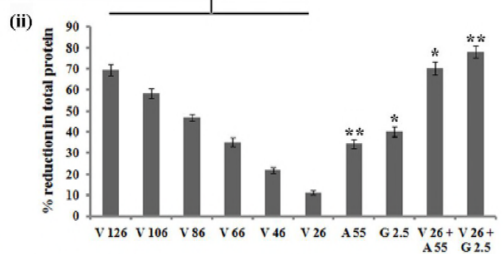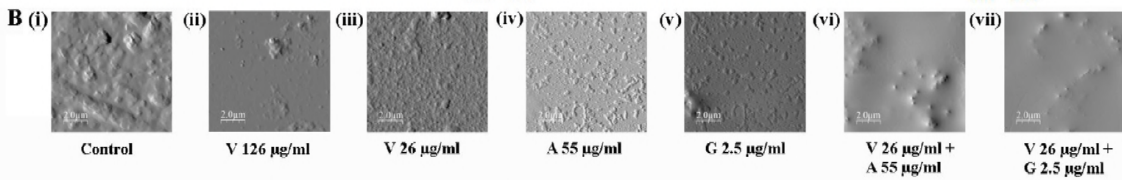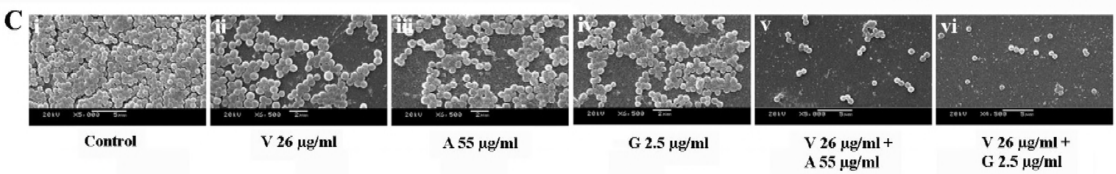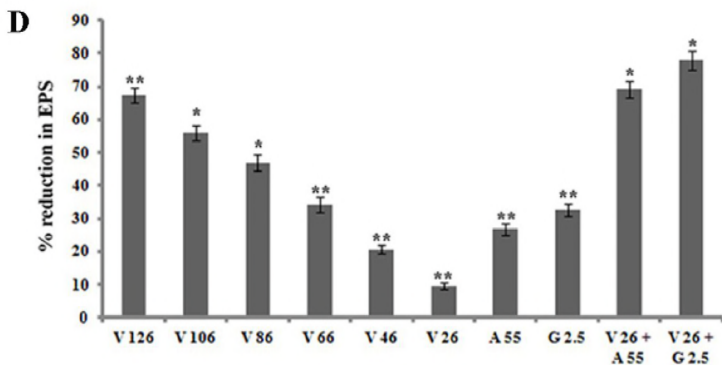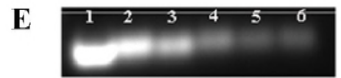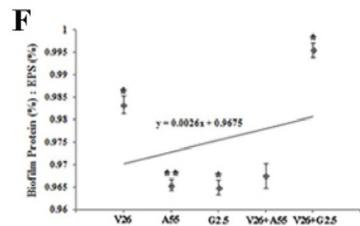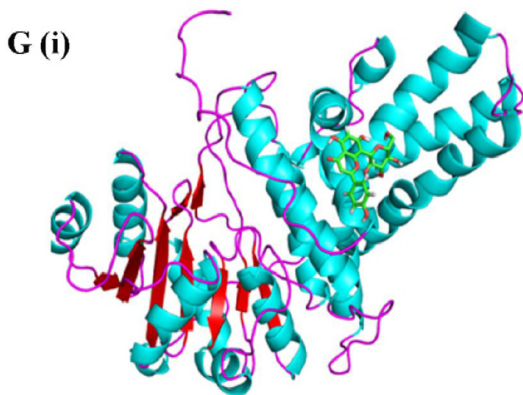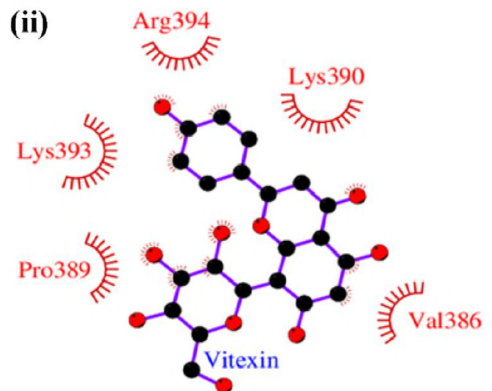

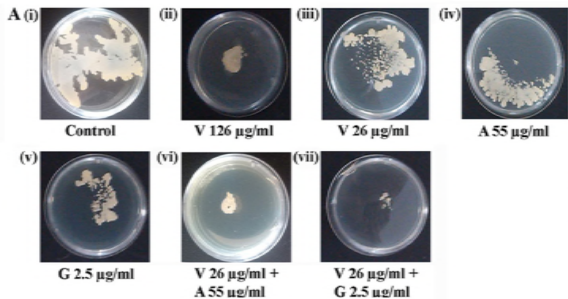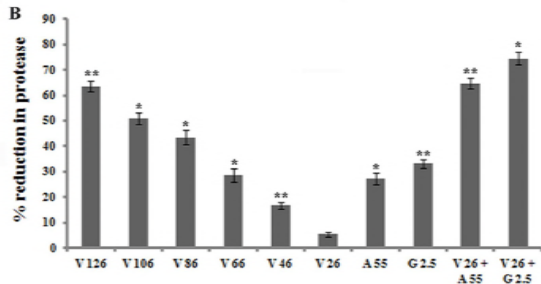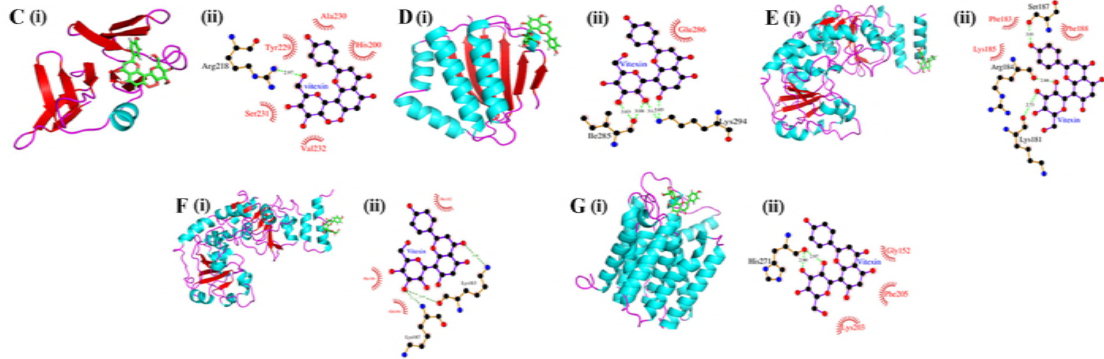

**Liver**

**Spleen**

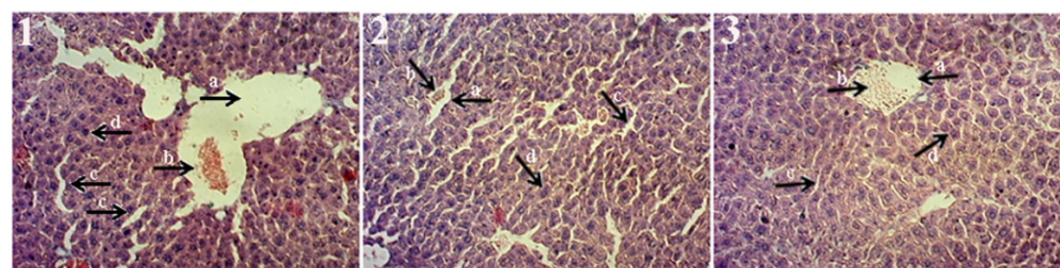

**Control**

**V 26µg/ml**

**A 55µg/ml**

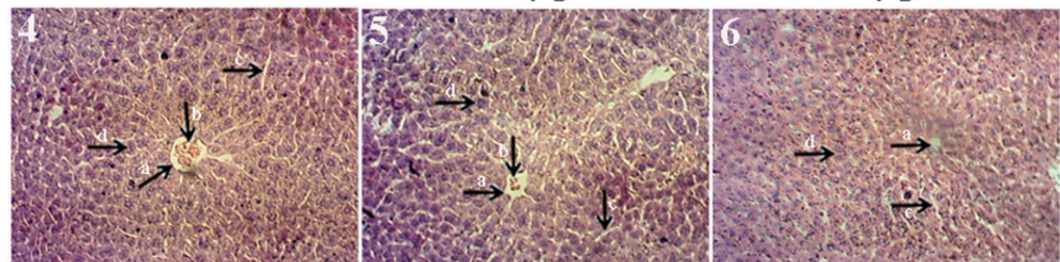

**G 2.5µg/ml**

**V 26+A 55µg/ml**

**V 26+G 2.5µg/ml**

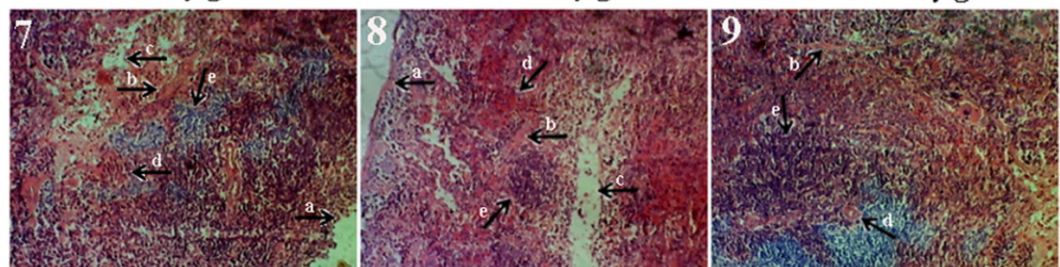

**Control**

**V 26µg/ml**

**A 55µg/ml**

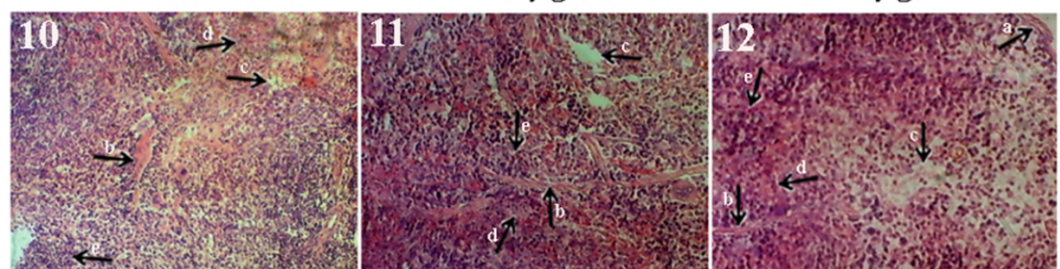

**G 2.5µg/ml**

**V 26+A 55µg/ml**

**V 26+G 2.5µg/ml**

**A**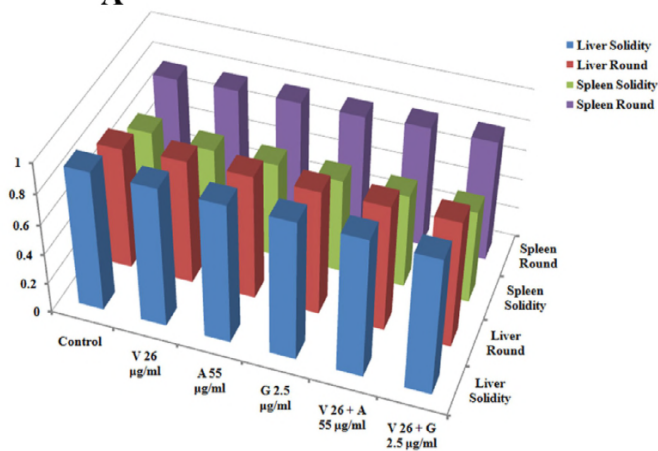**B**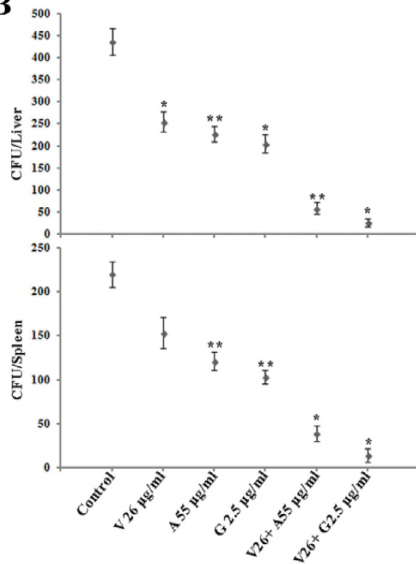**C**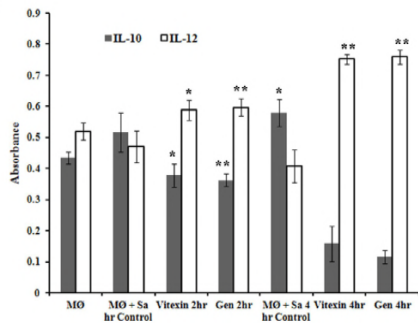**D**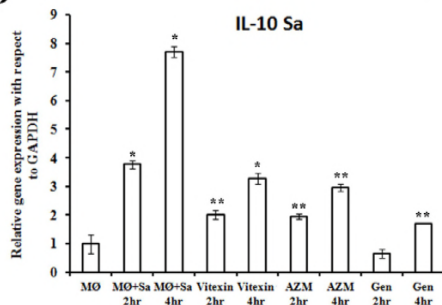**E**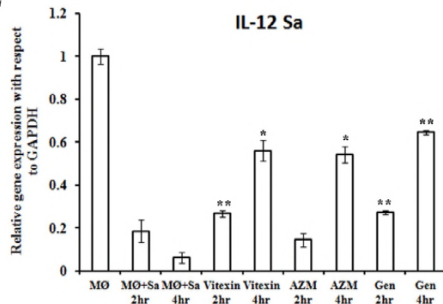



**Table 1:** Binding affinity and potential energy values after energy minimization of quorum sensing regulatory and biofilm formation associated proteins of *S. aureus* with a probable inhibitor molecule vitexin.

| S.No. | Receptor protein | PDB ID | Native ligand                          | Potential energy after energy minimization | Autodock binding score* |
|-------|------------------|--------|----------------------------------------|--------------------------------------------|-------------------------|
| 1.    | AgrC             | 4BXI   | Acetate ion                            | -5.9808762e+05                             | -3.9                    |
| 2.    | AgrA             | 4G4K   | Glycerol                               | -5.9459862e+05                             | +10.3                   |
| 3.    | DltA             | -      | AMP                                    | -1.2131328e+06                             | -6.2                    |
| 4.    | IcaA             | -      | Beta-D-Glucose                         | -2.1266348e+06                             | -3.7                    |
| 5.    | SpA              | 4NPE   | Thiocyanate                            | -5.9989606e+06                             | -3.0                    |
| 6.    | SasG             | 3TIQ   | 2-amino-hydroxymethyl-propane-1,3-diol | -1.4015485e+05                             | -3.8                    |
| 7.    | TarL             | -      | EDT                                    | -1.1858954e+06                             | 53.7                    |
| 8.    | TarK             | -      | EDT                                    | -1.1773525e+06                             | -3.3                    |
| 9.    | TarO             | -      | Magnesium ion                          | -1.1811139e+06                             | -4.8                    |

\*Autodock gives a binding score indicating the binding affinity measured in kcal/mol. Negative scores indicate high binding affinity whereas positive scores indicate weak binding.
